# Supplementary material for: A regional and multi-faceted approach to postgraduate water education – the WaterNet experience in Southern Africa
Source: Copernicus journal article supplement (doi:10.5194/hess-16-4225-2012), 2012-11-14
Supplement: Supplementary file 1 [file hess-16-4225-2012-supplement.pdf]

1 **A regional and multi-faceted approach to postgraduate water education – the**  
2 **WaterNet experience in Southern Africa**

3  
4  
5 **SUPPLEMENT**

6  
7 **Integrated Water Resources Management for Improved Rural Livelihoods in the**  
8 **Limpopo River Basin (Limpopo PN17).** (Source: Ncube et al., 2010 and Kileshye-Onema et  
9 al., 2011)

10  
11 An integrated approach to water resource management is required to balance water for food and  
12 nature but also to unlock pathways to sustainable development. The semi-arid Limpopo basin is  
13 a hotspot area in terms of scarcity of water for food as well as poverty. Translating IWRM from  
14 concept to action here poses a great challenge. Water institutions adopt a conventional blue  
15 water framework, focusing on water supply for irrigation, domestic and industrial use. In semi-  
16 arid regions such a water resource strategy has its limitations, though. Blue water resources for  
17 irrigation are over-committed, while the bulk of agricultural produce sustaining lives of resource  
18 poor farmers originates from green water flows in rainfed crop and livestock production.

19  
20 IWRM is a systems approach to water management, based on the principle of managing the full  
21 water cycle, including green water. The improvement in resilience that the IWRM approach can  
22 impart to rural livelihood systems has been investigated and described by a series of case studies.  
23 Community or catchment water resource assessments must become an essential precursor to  
24 food security interventions, due to the convergence of water scarcity and food scarcity, and the  
25 constraints that water resource availability impose on development initiatives in basins such as  
26 the Limpopo (Love et al., 2006, 2010).

27  
28 Access to green water in rainfed farming can be improved through a package of conservation  
29 agriculture techniques. Conservation tillage methods, such as planting basins, help to  
30 concentrate rainfall that falls in the field into the root zone of the crops and decreases runoff out  
31 of the field (Ncube et al., 2009). Best results are obtained when such methods are combined  
32 with fertility improvements such as manure, or micro-dosing with nitrogen fertilizer or with  
33 measures such as mulching that improve the use of water by crops and also decrease  
34 evaporation (Mupangwa, 2009). Yield improvements in rainfed farming translate very quickly  
35 into major improvements in green water productivity (Ncube et al., 2007; Rockström et al.,  
36 2007). The farming system's resilience is thus raised without industrial scale interventions.

37

38 Supplementary irrigation, using micro-catchment or runoff farming incorporates small-scale  
39 utilization of blue water into rainfed farming. It thus represents a nexus between rainfed and  
40 irrigated farming and conjunctive use of green and blue water. Studies in the Limpopo Basin  
41 (Mwenge Kahinda et al., 2007; Magombeyi and Taigbenu, 2008) have shown that there is a  
42 substantial yield gap which supplementary irrigation can bridge. This is particularly the case  
43 especially during years with dry spells during the growing season, when conventional rainfed  
44 agriculture may fail completely.

45

46 A multi-stakeholder approach to decision-making builds resilience as negotiation processes  
47 between users result in new institutions, or new roles for existing institutions, such as school  
48 boards which take over borehole management. Such institutions often evolve and revolve  
49 around specific infrastructure (Mabiza et al. 2006). At the same time, these community-based  
50 institutions need linkage to formal water management structures (Dzingirai and Manzungu,  
51 2009).

52

53

#### 54 **References**

55

56 Dzingirai, V., and Manzungu, E.: Towards an institutional model for water resources  
57 management, 10<sup>th</sup> WaterNet/WARFSA/GWP-SA Annual Symposium, Uganda, 2009.

58 Kileshye-Onema, J.-M., Love, D., Sullivan, A., and Takawira, A.: Research for impact, an  
59 approach on capacity development from the Limpopo Basin, 3<sup>rd</sup> International Forum on  
60 Water and Food, November, Tshwane, South Africa, 2011.

61 Love, D., Twomlow, S., Mupangwa, W., Van der Zaag, P., and Gumbo B.: Implementing the  
62 millennium development food security goals – Challenges of the southern African context,  
63 *Phys Chem Earth*, 31 (15-16), 731-737, 2006.

64 Love, D., Uhlenbrook, S., Twomlow, S., and Van der Zaag, P.: Changing hydroclimatic and  
65 discharge patterns in the northern Limpopo Basin, Zimbabwe, *Water SA*, 36(3), 335-  
66 350, 2010.

67 Mabiza, C., Van der Zaag, P., Manzungu, E., and Ahlers, R.: Community based water resource  
68 management Institutions: perspectives from the Mzingwane Catchment, Zimbabwe,  
69 Paper presented at the WaterNet/WARFSA/GWP-SA Annual Symposium, 1-3  
70 November, Lilongwe, Malawi, 2006.

71 Magombeyi, M.S., and Taigbenu, A.E.: Crop yield risk analysis and mitigation of smallholder  
72 farmers at quaternary catchment level: Case study of B72A in Olifants river basin,  
73 South Africa, *Phys Chem Earth*, 33, 744 – 756, 2008.

- 74 Mupangwa, W.: Water and nitrogen management for risk mitigation in semi-arid cropping  
75 systems, PhD thesis. University of the Free State, South Africa, 2009.
- 76 Mwenge Kahinda, J.-M., Rockström, J., Taigbenu, A.E., and Dimes, J.: Rainwater harvesting to  
77 enhance water productivity of rainfed agriculture in the semi-arid Zimbabwe, *Phys*  
78 *Chem Earth* 32, 1068-1073, 2007.
- 79 Ncube, B., Dimes, J., Twomlow, S., Mupangwa, W., and Giller, K.: Raising the productivity of  
80 smallholder farms under semi-arid conditions by use of small doses of manure and  
81 nitrogen: a case of participatory research, *Nutr Cycl Agroecosys*, 77, 53-67, 2007.
- 82 Ncube, B., Magombeyi, M., Munguambe, P., Mupangwa, W., and Love, D.: Methodologies and  
83 case studies for investigating upstream-downstream interactions of rainwater water  
84 harvesting in the Limpopo Basin, in: Humphreys, L (ed.), *Proceedings of the Workshop*  
85 *on Increasing the Productivity and Sustainability of Rainfed Cropping Systems of Poor,*  
86 *Smallholder Farmers, Tamale, Ghana, 22-25 September 2008, The CGIAR Challenge*  
87 *Program on Water and Food, Colombo, 209-221, 2009.*
- 88 Ncube, B., Manzungu, E., Love, D., Magombeyi, M., Gumbo, B., and K. Lupankwa: *The*  
89 *Challenge of Integrated Water Resource Management for Improved Rural Livelihoods:*  
90 *Managing Risk, Mitigating Drought and Improving Water Productivity in the Water*  
91 *Scarce Limpopo Basin, CPWF Project Number 17: CGIAR Challenge Program on Water*  
92 *and Food Project Report series, 2010. Available online at [www.waterandfood.org](http://www.waterandfood.org).*
- 93 Rockström, J., Wani, S., and Hatibu, N.: Managing water in rainfed agriculture, in: Molden, D.  
94 (ed.), *Water for Food, Water for Life: a Comprehensive Assessment of Water Use in*  
95 *Agriculture, Earthscan, London, and the International Water Management Institute,*  
96 *Colombo, pp315-348, 2007.*
- 97
